# Supplementary material
Source: PubMed Central journal article supplement (PMC2613004)
Supplement: NIHMS73582-supplement-02.pdf [file NIHMS73582-supplement-02.pdf]

**Supplemental Methods:****Immunohistochemical staining procedures**

Staining for alkaline phosphatase activity was performed in tissue that was fixed with 4% paraformaldehyde for four hours at 4°C prior to being paraffin wax imbedded. Paraffin sections were dehydrated and dewaxed as described previously<sup>1</sup>. Slides were stained with a biotin conjugate of the duct binding lectin *Dolichos biflorus* agglutinin (Vector Laboratories; B-1035) to mark ducts. Endogenous phosphatases were inactivated via incubation at 65°C for 30 minutes in NTM buffer containing 100mM NaCl, 100mM Tris, and 5 mM MgCl<sub>2</sub>. Subsequently, slides were stained with BM Purple AP substrate (Roche) overnight and then counterstained with nuclear fast red (Vector Laboratories; H-3403) to provide contrast. For Alcian Blue staining, rehydrated paraffin sections were stained for 30 minutes at room temperature in a 3% solution of Alcian Blue (8GX 10g/l) diluted in acetic acid. Slides were then washed for 2 minutes in water, and counterstained with nuclear fast red.

**Antibodies**

The following primary antibodies were used at the indicated dilution: mouse AE1/AE3 (ID Labs, Canada; BP715) rabbit alpha-1-antitrypsin 1:1000 (Biogenix, Inc; AR015-5R), mouse β-catenin 1:100 (BD; 610154), mouse CD10 1:100 (Novocastra, Clone 56C6; Org8941), mouse CD56 1:100 (Invitrogen, clone 123C3; 07-5603), mouse chromogranin A 1:50 (ID Labs, Canada clone LK2H10; BP705), chymotrypsin 1:2,000 (Bioscience Resource Project; A50142H), mouse CK19 1:1000 (Hybridoma Bank), goat clusterin-α 1:100 (Santa Cruz Biotech, C18; SC6419) rabbit cyclin D1 1:100 (Lab Vision Corp.; RM-9104-R7), mouse E-cadherin 1:200 (BD, 610181), rabbit estrogen

receptor alpha 1:200 (Labvision/Neomarkers clone SP1; RM9101) rabbit Hes1:10,000 (kindly provided by T. Sudo, Toray Industries, Inc., Kanagawa, Japan), neuron specific enolase (NSE, Cell Marque Corp, clone e27; CMC720), rabbit Pdx-1 1:1,000 (kindly provided by Dr. Michael German), rabbit Patched 1:100 (Abcam, ab27529), rabbit progesterone receptor (Ventana, clone 1E2; 790-4296), hamster mucin 1 1:500 (Neomarkers; HM-1630), goat Shh 1:50 (R&D, AF445), mouse Synaptophysin 1:200 (Biogenex, MU363-UC), mouse vimentin 1:100 (Dako, MO725 clone V9).

The following secondary antibodies were used for immunofluorescence: anti rabbit Alexa 555; 1:200 (Molecular Probes; A-21428), anti rabbit Alexa 555 1:200 (Molecular Probes; A-11034), anti hamster-Cy3, 1:200 (Jackson; 127-165-099), and anti mouse Alexa 488, 1:200 (Molecular Probes; A-11029). For immunohistochemistry, a biotinylated anti-goat (Vector; BA-9500) was used at a dilution of 1:200. Staining for diaminobenzidine (DAB) was performed with the ABC Elite immunoperoxidase system (Vector Laboratories; PK-6100).

Immunofluorescently stained slides were mounted with Vectashield hard mount media containing the nuclear stain, DAPI (Vector). Immunohistochemically stained slides were mounted with Permount reagent. Bright field images were acquired using a Zeiss Axio Imager D1 scope; fluorescent images were captured using a Leica DMIRE2 SP2 confocal microscope, gross morphology images were acquired using a Nikon D70 digital SLR.

### **Morphometric quantification of Pdx1<sup>+</sup> cell number**

At e12.5, the whole pancreatic bud was sectioned and aliquoted as described previously<sup>2</sup> in order to obtain representative results. In order to quantify the number of Pdx1<sup>+</sup> cells present in 7 control, 5 *PdxCre<sup>early</sup>*; *β-cat<sup>active</sup>*, and 5 *PtflaCre*; *β-cat<sup>active</sup>* intact e12.5 embryos were paraffin

imbedded, cut into 6μm sagittal sections, and aliquotted onto slides. Following immunofluorescence staining for E-cadherin (to mark the epithelium) and Pdx1, the number of Pdx1+ cells within the pancreatic epithelium was counted on 1 section every 96μm until the entire pancreatic bud was evaluated.

### **Quantitative PCR analysis**

RNA isolation, cDNA preparation, and qPCR was performed as described previously<sup>3</sup>. RNA expression of Wnt and Hh pathway target genes was normalized based upon comparison to Cyclophilin or glucoronidase (GUS) expression.

### **qPCR primer sequences**

|            |   |                           |
|------------|---|---------------------------|
| Axin2      | F | GCCAATGGCCAAGTGTCTCT      |
|            | R | GCGTCATCTCCTTGGGCA        |
| Cdk4       | F | CCCACCTCTCCTTACGAGGTT     |
|            | R | AGAAGACAGATACACCTGCCCTTTA |
| E-cadherin | F | GAGCGTGCCCCAGTATCGT       |
|            | R | GGCTGCCTTCAGGTTTTTCATC    |
| c-jun      | F | TCCAAGTGCCGGAAAAGG        |
|            | R | GAGTTTTGCGCTTTCAAGGTTT    |
| c-Myc      | F | CCTAGTGCTGCATGAGGAGACA    |
|            | R | CCTCATCTTCTTGCTCTTCTTCAGA |
| CyclinD1   | F | CGGCCCGAGGAGCTG           |
|            | R | GGCCAGGTTCCACTTGAGC       |

Cyclophilin F TCACAGAATTATTCCAGGATTCATG  
R TGCCGCCAGTGCCATT

Gli1 F GCCACACAAGTGCACGTTTG  
R AAGGTGCGTCTTGAGGTTTTCA

GUS F ACGGGATTGTGGTCATCGA  
R TCGTTGCCAAAACCTCTGAGGTA

Hes1 F AAACCAAAGACGGCCTCTGA  
R TCTTGCCCTTCGCCTCTTC

Ihh F TCCAAGGCCACGTGC  
R GCAGCCACCTGTCTTGGC

p21 F TCCACAGCGATATCCAGACA  
R GGACATCACCAGGATTGGAC

Ptc F CCCTAACAAAAATTCAACCAAACCT  
R GCATATACTTCCTGGATAAACCTTGAC

Shh F CAAAGCTCACATCCACTGTTCTG  
R GAAACAGCCGCCGGATTT

Tcf1 F GCTGCCATCAACCAGATCCT  
R AGTTCATAGTACTTGGCCTGCTCTTC

### Western blotting

Tissue lysates were prepared via homogenization in RIPA buffer (50 mM Tris-HCl at pH 7.4, 1% [v/v] NP40, 0.1% [w/v] SDS, 0.25% [w/v] Na-deoxycholate, 1 mM EDTA, phosphatase [1 mM Na-orthovanadate, 40 mM NaF, 10 mM glycerophosphate, 5 mM pyrophosphate], protease inhibitor [Complete—Roche]). Lysates were electrophoresed in 15% SDS-PAGE gels,

transferred to PVDF membrane (Bio-Rad), and processed for immunoblotting with antibodies against ERK1/2, phospho-ERK1/2 (p44/42), AKT, phospho-AKT (Ser473), phospho-PDK1, phospho-s6K (p70), and phospho-EGFR (1:1000 dilution; Cell Signaling Technology) or GAPDH (1:3000 dilution). HRP-conjugated secondary antibody was used at 1:1000 dilution and detected by ECL (Amersham Biosciences).

### **References**

1. Kim SK, Hebrok M, Melton DA. Notochord to endoderm signaling is required for pancreas development. *Development* 1997b;124:4243-4252.
2. Kawahira H, Ma NH, Tzanakakis ES, McMahon AP, Chuang PT, Hebrok M. Combined activities of hedgehog signaling inhibitors regulate pancreas development. *Development* 2003;130:4871-9.
3. Cano DA, Sekine S, Hebrok M. Primary cilia deletion in pancreatic epithelial cells results in cyst formation and pancreatitis. *Gastroenterology* 2006;131:1856-69.
